# Supplementary material for: Analysis of the application of computerized optokinetic nystagmus analyzer in vision examination
Source: Research Square preprint supplement (doi:10.21203/rs.3.rs-7451342/v1), 2025-09-29
Supplement: Supplementary file 1 [file 81bbf9886dadd0fa2ad95380.xlsx]

## Sheet: OKN analyzer vs OKN drum
computerized OKN analyzer	consistency	compliance
0.6	1	√
0.8	1	√
0.3	0	√
0.3	0	√
0.25	0	√
0.25	0	Fit general
0.3	0	√
0.15	0	√
1	1	√
0.8	1	Fit general
1	1	√
0.6	1	√
0.6	1	√
1	1	√
0.15	0	√
0.5	1	√
0.5	0	√
1	1	√
1	1	√
0.8	1	√
0.15	1	√
0.3	0	√
0.12	0	√
1	1	√
0.12	1	√
0.25	0	√
0.25	1	√
0.8	1	√
0.8	1	√
1	1	√
0.6	1	√
0.2	0	√
0.4	1	√
0.2	0	√
0.4	1	√
0.4	1	√
0.5	1	√
1	1	√
0.4	1	√
1	1	√
1	1	√
0.4	1	√
0.5	1	√
0.5	1	√
1	1	Fit general
0.6	1	√
0.25	0	√
0.8	1	√
0.8	1	√
0.8	1	√
0.8	1	√
0.5	0	√
0.4	1	√
0.25	0	√
0.8	1	√
0.2	0	√
0.3	0	√
0.15	0	√
0.8	1	Fit general
0.6	1	√
1	1	√
0.5	0	√
1.2	1	√
1	1	√
1.2	1	√
0.8	1	√
1	1	√
0.4	1	√
0.4	1	√
0.5	1	√
1	1	√
1	1	√
0.6	1	√
0.8	1	√
1	1	√
0.3	1	√
0.1	0	√
1	1	√
0.6	1	√
0.3	0	Fit general
0.2	0	√
1	1	√
0.15	0	√
0.8	1	√
0.5	1	√
0.8	1	√
1	1	√
0.4	1	√
0.4	1	√
0.5	1	√
0.8	1	√
1.2	1	√
1	1	√
1	1	√
0.8	0	√
1	1	√
0.8	1	√
0.6	1	√
0.5	1	√
0.6	1	√
0.25	0	√
0.5	1	√
1	1	√
0.6	1	√
0.6	1	√
0.8	1	√
0.1	0	√
1.2	1	√
0.25	1	√
0.25	0	√
1	1	√
0.6	1	√
1	1	√
1	1	Fit general
0.8	1	√
0.4	1	√
0.4	1	√
0.6	1	√
0.8	1	√
0.6	1	√
0.12	0	√
1	1	√
0.5	1	√
0.12	0	√
0.8	1	√
1	1	√
0.6	1	Fit general
1	1	√
1	1	√
1	1	√
0.25	0	√
1	1	√
0.25	0	√
0.4	1	√
0.8	1	Fit general
1	1	√
0.6	1	√
0.8	1	√
0.5	1	√
0.12	0	√
0.6	1	√
1	1	√
0.8	1	√
0.3	0	√
0.5	1	Fit general
0.8	1	√
0.6	1	√
1	1	√
1	1	√
0.6	0	√
1	1	√
0.4	1	√
1	1	√
0.15	0	√
0.4	1	√
1	1	√
0.6	1	√
1.2	1	√
1	1	√
0.6	0	√
0.5	0	√
0.15	1	√
0.6	1	Fit general
0.8	1	√
1	1	√
1	1	√
0.8	1	√
0.4	1	√
0.25	0	√
0.4	1	√
0.8	1	√
0.6	1	√
1	1	√
0.8	1	√
1	1	√
0.12	0	√
0.8	1	√
1	1	√
1	1	√
0.6	1	√
0.15	0	√
0.3	0	√
1	1	√
0.4	1	√
0.6	1	Fit general
0.6	1	√
0.8	1	√
0.12	0	√
0.1	0	√
0.8	1	√
0.5	0	√
0.6	1	√
1	1	√
0.6	1	√
1	1	√
0.8	1	√
0.5	1	√
1	1	√
0.8	1	√
1	1	√
0.6	1	√
0.25	0	√
0.08	0	√
1	1	√
0.8	1	√
0.5	1	√
1	1	√
1	1	√
0.6	1	√
0.6	1	√
0.6	1	√
0.6	1	√
0.4	1	√
0.8	1	√
0.4	1	√
1	1	√
1.2	1	√
0.8	1	√
0.1	0	√

## Sheet: OKN analyzer vs traditional VA 
computerized OKN analyzer	traditional visual acuity chart	computerized OKN analyzer	traditional visual acuity chart
R	R	L	L
1	1	0.8	0.6
0.2	0.2	0.12	0.15
0.5	0.6	0.3	0.6
0.25	0.4	0.6	0.6
0.6	0.6	0.8	0.6
0.8	1	1	1
0.8	0.5	1	0.8
1	1.2	1	1
0.6	0.8	0.6	1
0.25	0.25	0.2	0.2
0.8	1	0.8	0.6
1	1.2	1	1
0.3	0.3	0.3	0.3
1	1	0.6	0.6
1	1.2	0.8	0.8
1.2	1.5	1.2	1.5
0.2	0.4	0.15	0.2
1	1.2	1	1.2
0.2	0.2	0.4	0.3
0.15	0.1	0.25	0.1
1	1.2	0.2	0.25
1.2	1.2	1	1
1	0.8	1	1
0.5	0.4	0.5	0.5
0.25	0.2	0.4	0.3
0.8	0.5	0.8	0.6
0.4	0.4	0.6	0.5
1	1	1	0.8
1	0.8	1	1
1.2	1.2	1	1.2
0.6	0.6	0.2	0.5
1	0.4	1	0.5
1.2	1.2	1.2	1
0.8	0.6	0.8	0.8
0.5	0.6	0.4	0.6
1	1	1	1
1	0.8	1	0.5
0.2	0.15	0.12	0.1
0.2	0.2	0.3	0.4
0.25	0.3	0.25	0.3
0.8	1	0.6	0.8
0.6	0.6	0.8	1
1	1	1	1.2
0.8	0.6	1	1
0.4	0.4	0.4	0.5
1	1.2	1	1.2
0.6	0.5	1	1
1	1	1	0.5
1	1	1	1
0.6	0.6	0.4	0.4
0.8	1	0.8	1
0.3	0.4	0.8	0.8
0.15	0.3	1	1.5
0.5	0.4	0.8	1
0.8	1	0.4	0.5
0.6	0.5	0.6	0.8
1	0.8	0.6	0.8
0.1	0.1	0.12	0.1
0.5	0.6	0.4	0.5
1	0.6	0.6	0.5
0.8	1	1	1.2
0.8	1.2	0.8	1
1	1.2	0.8	1.2
1	1	1	0.8
0.8	0.6	0.6	0.6
0.12	0.12	0.1	0.15
0.5	0.4	0.3	0.3
0.8	0.8	1	0.5
1	1	1	1.2
1	1.2	1	1.2
0.8	0.6	1	0.8
0.6	0.6	0.5	0.5
0.5	0.6	0.8	0.8
0.4	0.5	0.4	0.6
1	1	1	1.2
0.8	1	0.5	0.4
0.5	0.6	0.4	0.4
0.12	0.12	0.15	0.15
0.6	0.4	1.2	1
0.6	0.4	0.6	0.6
1	0.8	0.8	1
0.2	0.2	0.8	0.8
0.1	0.2	0.1	0.2
0.8	0.5	0.8	0.4
0.8	1	0.8	1
0.4	0.5	0.6	0.5
0.5	0.5	0.4	0.4
0.15	0.15	0.2	0.15
1	0.8	0.8	0.5
0.8	0.6	1	0.8
0.6	0.6	0.6	1
0.5	0.8	0.5	1
0.08	0.1	0.08	0.1
0.8	0.6	0.6	0.8
1	1	0.25	0.2
0.8	0.5	0.8	0.8
0.6	0.5	0.4	0.2
1	1.2	0.5	0.4
0.4	0.6	0.4	0.6
0.8	0.5	0.8	0.6
0.6	0.6	0.4	0.6
1	1.2	1	1.2
1	1	0.8	1
0.4	0.6	0.4	0.8

## Sheet: age
0~6				7～15				>18
computerized OKN analyzer	traditional visual acuity chart	computerized OKN analyzer	traditional visual acuity chart	computerized OKN analyzer	traditional visual acuity chart	computerized OKN analyzer	traditional visual acuity chart	computerized OKN analyzer	traditional visual acuity chart	computerized OKN analyzer	traditional visual acuity chart
R	R	L	L	R	R	L	L	R	R	L	L
0.6	0.6	0.8	1	0.8	1	1	1	0.25	0.25	0.2	0.2
0.8	0.5	0.8	0.6	1	1	1	0.8	0.2	0.2	0.4	0.3
1	0.8	1	1	1	1	1	1	0.8	0.6	1	1
1	0.8	1	1	0.4	0.4	0.4	0.5	0.6	0.4	1.2	1
0.8	1	0.6	0.8	1	0.8	0.6	0.8	0.4	0.4	0.6	0.5
0.6	0.5	1	1	1	1.2	0.8	1.2	0.2	0.2	0.3	0.4
0.5	0.6	0.4	0.5	0.8	1	0.8	1	0.5	0.6	0.4	0.4
0.8	0.6	1	0.8	0.4	0.5	0.6	0.5	0.15	0.1	0.25	0.1
0.6	0.4	0.6	0.6	0.6	0.6	0.6	1	0.15	0.3	1	1.5
0.8	0.5	0.8	0.4	0.8	0.5	0.8	0.8	1	1.2	1	1.2
0.5	0.5	0.4	0.4	0.4	0.6	0.4	0.6	0.6	0.6	0.5	0.5
0.8	0.6	0.6	0.8	1	1.2	1	1	1	1	0.8	0.6
0.6	0.6	0.4	0.6	1	1	0.6	0.6	1	0.8	1	0.5
0.4	0.6	0.4	0.8	0.5	0.4	0.5	0.5	0.1	0.1	0.12	0.1
0.8	0.5	1	0.8	1	1	1	0.5	0.25	0.4	0.6	0.6
0.6	0.8	0.6	1	0.15	0.15	0.2	0.15	0.12	0.12	0.15	0.15
0.6	0.6	0.2	0.5	0.8	0.6	1	0.8	0.08	0.1	0.08	0.1
0.8	0.6	0.8	0.8	1.2	1.2	1	1	0.5	0.6	0.3	0.6
0.5	0.6	0.4	0.6	0.6	0.6	0.4	0.4	0.2	0.4	0.15	0.2
0.8	1	0.4	0.5	0.3	0.4	0.8	0.8	0.8	1	1	1.2
0.6	0.5	0.6	0.8	0.12	0.12	0.1	0.15	1	1.2	0.8	0.8
0.8	1.2	0.8	1	0.5	0.8	0.5	1	0.2	0.2	0.12	0.15
0.8	0.6	0.6	0.6	0.25	0.2	0.4	0.3	0.6	0.6	0.8	0.6
0.5	0.4	0.3	0.3	0.8	0.5	0.8	0.6
0.8	0.8	1	0.5	1	0.4	1	0.5
1	1	1	1.2	0.8	1	0.5	0.4
1	1.2	1	1.2	1	1.2	0.5	0.4
1	1.2	1	1	1	1.2	0.2	0.25
0.8	1	0.8	0.6	1.2	1.2	1.2	1
0.3	0.3	0.3	0.3	0.2	0.15	0.12	0.1
1.2	1.5	1.2	1.5	1	1	1	1.2
1.2	1.2	1	1.2	1	1	0.25	0.2
0.25	0.3	0.25	0.3	0.5	0.4	0.8	1
1	1.2	1	1.2	1	1.2	1	1.2
1	1	1	1	0.2	0.2	0.8	0.8
0.8	1	0.8	1	1	1	0.8	1
1	0.6	0.6	0.5	1	1	1	1.2
1	1	1	0.8
0.5	0.6	0.8	0.8
0.4	0.5	0.4	0.6
1	0.8	0.8	1
0.1	0.2	0.1	0.2
1	0.8	0.8	0.5
0.6	0.5	0.4	0.2

## Sheet: refractive error
myopia						hyperopia
computerized OKN analyzer	traditional visual acuity chart	diopter	computerized OKN analyzer	traditional visual acuity chart	diopter	computerized OKN analyzer	traditional visual acuity chart	diopter	computerized OKN analyzer	traditional visual acuity chart	diopter
R	R	R	L	L	L	R	R	R	L	L	L
1	1	-0.75	0.8	0.6	-2.25	R	R	R	L	L	L
0.8	0.5	-0.75	1	1		0.8	1	+1.25	1	1	+2.00
0.6	0.8	-0.75	0.6	1	-0.75	0.8	1	+3.00			+0.25
0.25	0.25	-4.25	0.2	0.2	-4.50	1	0.8	+1.75	0.8	0.6	+3.00
0.3	0.3	-2.00	0.3	0.3	-2.00	0.8	0.5	+3.25	1	1	+1.00
1	1	-1.00	0.6	0.6	-0.75	1	1	+1.75	0.8	0.6	+3.50
1	1.2	-0.50	0.8	0.8	-1.00				1	0.8	+2.25
1	1.2	-0.50	1	1.2	-0.50	1.2	1.2	+0.50	1	1.2	+0.75
0.2	0.2	-3.75	0.4	0.3	-4.25	0.6	0.6	+0.50	0.2	0.5	+1.75
0.15	0.1	-5.25	0.25	0.1	-3.75				0.8	0.8	+2.75
1	1.2		0.2	0.25	-2.25	0.8	0.6	+3.00	0.4	0.6	+1.00
0.5	0.4	-3.50	1	1	-0.50	0.5	0.6	+1.25	0.25	0.3	+2.00
0.25	0.2	-4.75	0.5	0.5	-2.75	0.25	0.3	+2.00	0.8	1	+3.00
0.4	0.4	-1.75	0.4	0.3	-3.50	0.6	0.6	+2.50			+0.25
1	0.4	-1.25	0.6	0.5	-1.75	0.8	0.6	+2.25	1	1	+1.00
0.2	0.15	-4.00	1	0.5	-2.25	1	1.2	+0.50	1	1.2	+0.50
0.2	0.2	-4.75	1.2	1	-0.75	0.6	0.5	+0.75	1	1	+1.25
1	1	-0.50	0.12	0.1	-6.75	0.8	1	+3.25	0.8	1	+3.50
0.4	0.4	-2.75	0.3	0.4	-4.25				0.6	0.8	+4.75
1	1		0.4	0.5	-2.25	0.6	0.5	+2.75	0.6	0.8	+1.00
0.6	0.6	-2.25	1	1		1	0.8	+6.50	0.4	0.5	+2.75
0.3	0.4	-1.75	0.4	0.4	-3.75	0.5	0.6	+1.75	0.8	1	+1.00
0.15	0.3	-4.00	0.8	0.8		0.8	1.2	+1.00	0.8	1.2	+2.50
0.5	0.4	-4.75	1	1.5		1	1.2	+3.00	0.3	0.3	+0.75
0.1	0.1	-7.50	0.8	1	-1.50	0.8	0.6	+0.75	1	0.5	+1.50
1	0.6	-0.50	0.12	0.1	-5.75	0.5	0.4	+0.75	1	1.2	+0.75
0.8	1		0.6	0.5	-0.75	0.8	0.8	+1.50	1	1.2	+1.00
1	1	-0.75	1	0.8	-0.50	1	1	+0.50			+0.25
0.12	0.12	-5.25	0.6	0.6		1	1.2	+0.75	0.6	0.6	+1.00
0.6	0.6	-2.25	0.1	0.15	-5.25	0.8	0.6	+0.50	0.8	1	+3.00
0.4	0.5	-0.50	0.5	0.5	-1.75	1	1	+0.75	0.8	1	+1.00
0.5	0.6	-1.50	0.4	0.6	-0.75	0.6	0.4	+1.00	0.6	0.5	+3.00
0.12	0.12	-5.75	0.5	0.4	-2.25	1	0.8	+2.50	0.8	0.5	+3.50
0.2	0.2	-2.50	0.4	0.4	-2.00	0.8	1	+0.75	0.5	1	+0.75
0.1	0.2	-5.75	0.15	0.15	-5.75	0.4	0.5	+2.00
0.5	0.5	-0.50	1.2	1	-1.00	1	0.8	+0.75
0.15	0.15	-5.00	0.8	0.8	-0.75	0.5	0.8	+0.50
0.6	0.6	-0.50	0.1	0.2	-5.25
0.08	0.1	-6.75	0.4	0.4
			0.2	0.15	-4.25
			0.08	0.1	-6.50

## Sheet: VA
R eye						L eye
0.1～<0.5		0.5～<1.0		R>1.0		0.1～<0.5		0.5～<1.0		L>1.0
computerized OKN analyzer	traditional visual acuity chart	computerized OKN analyzer	traditional visual acuity chart	computerized OKN analyzer	traditional visual acuity chart	computerized OKN analyzer	traditional visual acuity chart	computerized OKN analyzer	traditional visual acuity chart	computerized OKN analyzer	traditional visual acuity chart
0.15	0.1	0.5	0.6	1	1.2	0.25	0.1	0.8	0.6	1	1.2
0.1	0.1	0.6	0.6	1	1.2	0.12	0.1	0.3	0.6	1	1.2
0.08	0.1	0.6	0.6	1	1.2	0.12	0.1	0.6	0.6	1	1.2
0.12	0.12	0.6	0.6	1	1.2	0.08	0.1	0.8	0.6	1	1.2
0.12	0.12	0.8	0.6	1	1.2	0.12	0.15	0.8	0.6	1	1.2
0.2	0.15	0.5	0.6	1.2	1.2	0.1	0.15	0.6	0.6	0.8	1.2
0.15	0.15	0.6	0.6	1.2	1.2	0.15	0.15	0.8	0.6	1	1.2
0.2	0.2	0.8	0.6	1.2	1.2	0.2	0.15	0.4	0.6	1	1.2
0.2	0.2	0.6	0.6	1	1.2	0.2	0.2	0.6	0.6	1	1.2
0.25	0.2	0.5	0.6	0.8	1.2	0.15	0.2	0.4	0.6	1	1.2
0.2	0.2	1	0.6	1	1.2	0.1	0.2	0.6	0.6	1.2	1.5
0.2	0.2	0.8	0.6	1	1.2	0.25	0.2	0.4	0.6	1	1.5
0.1	0.2	0.8	0.6	1	1.2	0.4	0.2	0.8	0.6
0.25	0.25	0.6	0.6	1	1.2	0.2	0.25	0.4	0.6
0.3	0.3	0.5	0.6	1.2	1.5	0.3	0.3	1	0.8
0.25	0.3	0.5	0.6			0.4	0.3	0.8	0.8
0.25	0.4	0.8	0.6			0.4	0.3	0.8	0.8
0.2	0.4	0.6	0.6			0.25	0.3	1	0.8
0.5	0.4	0.8	0.6			0.3	0.3	0.8	0.8
0.4	0.4	0.4	0.6			0.3	0.4	0.6	0.8
1	0.4	0.6	0.6			0.4	0.4	0.8	0.8
0.4	0.4	0.4	0.6			0.5	0.4	0.6	0.8
0.3	0.4	0.6	0.8			0.4	0.4	0.6	0.8
0.5	0.4	1	0.8			0.8	0.4	1	0.8
0.5	0.4	1	0.8			0.4	0.4	1	0.8
0.6	0.4	1	0.8			0.5	0.4	0.8	0.8
0.6	0.4	1	0.8			0.5	0.5	0.8	0.8
0.8	0.5	0.8	0.8			0.6	0.5	1	0.8
0.8	0.5	1	0.8			0.2	0.5	0.6	0.8
0.6	0.5	1	0.8			1	0.5	0.8	0.8
0.6	0.5	0.5	0.8			1	0.5	0.4	0.8
0.4	0.5	1	1			0.4	0.5	1	1
0.8	0.5	0.8	1			1	0.5	1	1
0.4	0.5	0.8	1			0.4	0.5	0.6	1
0.5	0.5	1	1			0.4	0.5	1	1
0.8	0.5	1	1			0.6	0.5	1	1
0.6	0.5	1	1			1	0.5	1	1
0.8	0.5	0.8	1			0.5	0.5	1	1
0.15	0.3	1	1			0.6	0.5	1.2	1
		1	1			0.8	0.5	1	1
		1	1					0.8	1
		0.8	1					1	1
		0.8	1					1	1
		0.8	1					1	1
		1	1					0.8	1
		1	1					0.8	1
		1	1					0.8	1
		0.8	1					1.2	1
		0.8	1					0.8	1
		1	1					0.8	1
		1	1					0.6	1
								0.5	1
								0.8	1
